# Supplementary material
Source: ML conference proceedings conference paper supplement (https://openreview.net/forum?id=9kFQEJSyCM)
Supplement: supplementary_material [file attachment]

---

# Supplementary Material for "RangePerception: Taming LiDAR Range View for Efficient and Accurate 3D Object Detection"

---

**Yeqi Bai<sup>1</sup> Ben Fei<sup>1,2</sup> Youquan Liu<sup>1</sup> Tao Ma<sup>1,3</sup>**

**Yuenan Hou<sup>1</sup> Botian Shi<sup>1,\*</sup> Yikang Li<sup>1</sup>**

<sup>1</sup>Shanghai AI Laboratory <sup>2</sup>Fudan University

<sup>3</sup>Multimedia Laboratory, The Chinese University of Hong Kong

{baiyeqi, feiben, liuyouquan, matao}@pjlab.org.cn

{houyuenan, shibotian, liyikang}@pjlab.org.cn

Supplementary material is available at <https://rangeperception.github.io>, to enhance the accessibility and comprehension of this study.

---

\*Corresponding author
